# Supplementary material
Source: PubMed Central journal article supplement (PMC3457239)
Supplement: JB.00510-12_zjb999091927so1.pdf [file JB.00510-12_zjb999091927so1.pdf]

# **Hfq influences multiple transport systems and virulence in the plant pathogen *Agrobacterium tumefaciens***

**Ina Wilms<sup>1#</sup>, Philip Möller<sup>1#</sup>, Anna-Maria Stock<sup>1</sup>, Rosemarie Gurski<sup>1</sup>, Erh-Min Lai<sup>2</sup> and Franz Narberhaus<sup>1\*</sup>**

<sup>1</sup>Lehrstuhl für Biologie der Mikroorganismen, Ruhr-Universität Bochum, 44780 Bochum, Germany

<sup>2</sup>Institute of Plant and Microbial Biology, Academia Sinica, Taipei, Taiwan

\* Corresponding author: Franz Narberhaus, Lehrstuhl für Biologie der Mikroorganismen, Ruhr-Universität Bochum, Universitätsstrasse 150, NDEF 06/783, 44780 Bochum, Germany. Tel: +49 (0)234 322 3100; Fax: +49 (0)234 321 4620; E-mail: [franz.narberhaus@rub.de](mailto:franz.narberhaus@rub.de)

# I.W. and P.M. contributed equally to this study.

**This file contains:**

**Supplementary Table S1:** Strains and plasmids used in this study

**Supplementary Table S2:** Oligonucleotides used in this study

**Figure S1:** Purification of the Hfq protein

**Figure S2:** Verification of the chromosomal *hfq* deletion

**Figure S3:** Altered tumour formation of  $\Delta hfq$  on plants

**Table S1: Strains and plasmids used in this study.**

| Strain or plasmid                       |           | Relevant characteristics                                                                             | Reference or source        |
|-----------------------------------------|-----------|------------------------------------------------------------------------------------------------------|----------------------------|
| <b>Strains</b>                          |           |                                                                                                      |                            |
| <b><i>Escherichia coli</i></b>          |           |                                                                                                      |                            |
| DH5 $\alpha$                            |           | Cloning host                                                                                         | (2)                        |
| BL21 (DE3)                              |           | Overexpression strain                                                                                | Novagen, Madison, USA      |
| <b><i>Agrobacterium tumefaciens</i></b> |           |                                                                                                      |                            |
| C58                                     |           | Wild-type                                                                                            | C. Baron, Montreal, Canada |
| C58 $\Delta hfq$                        |           | Derivate of the wild-type with deletion of the <i>hfq</i> gene                                       | This study                 |
| <b>Plasmids</b>                         |           |                                                                                                      |                            |
| pUC18                                   |           | Amp <sup>r</sup> ; cloning vector                                                                    | (4)                        |
| pET24b                                  |           | Km <sup>r</sup> ; vector for His-tag fusion and overexpression                                       | Novagen, Madison, USA      |
| pBBSyn                                  |           | Km <sup>r</sup> ; complementation vector                                                             | (1)                        |
| pK19 <i>mobsacB</i>                     |           | Km <sup>r</sup> ; suicide vector                                                                     | (5)                        |
| pK_up/do_ <i>hfq</i>                    | (pBo1649) | Km <sup>r</sup> ; pK19 <i>mobsacB</i> derivate carrying the up- and downstream regions of <i>hfq</i> | This study                 |
| runoff_C2A                              | (pBo1608) | Amp <sup>r</sup> ; pUC18 derivate carrying <i>AbcR1</i> with additional T7-promotor                  | (6)                        |
| runoff_ <i>atu2422</i>                  | (pBo1649) | Amp <sup>r</sup> ; pUC18 derivate carrying <i>atu2422</i> (100 bp) with additional T7-promotor       | (6)                        |
| pET24b_ <i>hfq</i>                      | (pBo2400) | Km <sup>r</sup> ; pET24b derivate carrying the <i>hfq</i> gene for protein purification              | This study                 |
| pBBSyn_ <i>hfq</i>                      | (pBo2405) | Km <sup>r</sup> ; pBBSyn derivate carrying the <i>hfq</i> gene for complementation                   | This study                 |
| pBISN1                                  | (pBo2317) | Km <sup>r</sup> ; pBin19 derivate carrying T-DNA borders enclosing the <i>gusA</i> intron            | (3)                        |

**Table S2: Oligonucleotides used in this study.**

T7 promoter sequences for generation of *in vitro* transcripts are written in bold letters. Restriction sites are underlined.

| Oligonucleotide            | Purpose                                                                                                                               | Sequence (5' to 3')                                     |
|----------------------------|---------------------------------------------------------------------------------------------------------------------------------------|---------------------------------------------------------|
| <i>Δhfq</i> _up_fw         | <i>Δhfq</i> mutant generation, up fragment                                                                                            | AAAAGAATT <u>CGAAGCGCTT</u> GAAACATCGCC                 |
| <i>Δhfq</i> _up_rv         | <i>Δhfq</i> mutant generation, up fragment<br>( <i>Δhfq</i> upstream fragment from 1445724 to 1446123 on the circular chromosome)     | AAA <u>ACTGCAGGGCGCCGCTTCTTTCTTTATT</u>                 |
| <i>Δhfq</i> _down_fw       | <i>Δhfq</i> mutant generation, down fragment                                                                                          | AAA <u>ACTGCAGTCAGGCTCCTTTAACGGTATC</u>                 |
| <i>Δhfq</i> _down_rv       | <i>Δhfq</i> mutant generation, down fragment<br>( <i>Δhfq</i> downstream fragment from 1446367 to 1446766 on the circular chromosome) | AAA <u>AGCATGCAACAGGGTTGCGGGACGCG</u>                   |
| <i>Δhfq</i> _check_fw      | <i>Δhfq</i> mutant generation, colony PCR                                                                                             | ATTGATTATTTTCCGGTATCCC                                  |
| <i>Δhfq</i> _check_rv      | <i>Δhfq</i> mutant generation, colony PCR                                                                                             | TGTTCCGATT <u>CAGGTCAGTC</u>                            |
| RNAprobe_ <i>rpsE</i> _fw  | Northern analysis; RNA-probe for <i>rpsE</i>                                                                                          | CCGTGAAGAGCGCGATAGCG                                    |
| RNAprobe_ <i>rpsE</i> _rv  | Northern analysis; RNA-probe for <i>rpsE</i>                                                                                          | <b>GAAATTAATACGACTCACTATAGGGCAGCAGAACCTTGCCTGCG</b>     |
| RNAprobe_ <i>4678</i> _fw  | Northern analysis; RNA-probe for <i>atu4678</i>                                                                                       | CGTCGATGTCGGCGTTGCGTCG                                  |
| RNAprobe_ <i>4678</i> _rv  | Northern analysis; RNA-probe for <i>atu4678</i>                                                                                       | <b>GAAATTAATACGACTCACTATAGGGCGTCGATCTGACCCTGGCTAAG</b>  |
| RNAprobe_ <i>0420</i> _fw  | Northern analysis; RNA-probe for <i>atu0420</i>                                                                                       | GCTTCGCGTCCGATCAAGAGC                                   |
| RNAprobe_ <i>0420</i> _rv  | Northern analysis; RNA-probe for <i>atu0420</i>                                                                                       | <b>GAAATTAATACGACTCACTATAGGGCGAAGACTTCGCGTGTGCCGT</b>   |
| RNAprobe_ <i>malE</i> _fw  | Northern analysis; RNA-probe for <i>malE</i>                                                                                          | CGGTTCCACCGCCCTTGG                                      |
| RNAprobe_ <i>malE</i> _rv  | Northern analysis; RNA-probe for <i>malE</i>                                                                                          | <b>GAAATTAATACGACTCACTATAGGGCGCGAACTGCTTCAGCGTGC</b>    |
| RNAprobe_ <i>dppA</i> _fw  | Northern analysis; RNA-probe for <i>dppA</i>                                                                                          | CGCCGGAAGGCTTCGATCC                                     |
| RNAprobe_ <i>dppA</i> _rv  | Northern analysis; RNA-probe for <i>dppA</i>                                                                                          | <b>GAAATTAATACGACTCACTATAGGGCCACGGGTTCTTGGTATCACCC</b>  |
| RNAprobe_ <i>4259</i> _fw  | Northern analysis; RNA-probe for <i>atu4259</i>                                                                                       | CCCAATGACAGCTTGACGGTCCG                                 |
| RNAprobe_ <i>4259</i> _rv  | Northern analysis; RNA-probe for <i>atu4259</i>                                                                                       | <b>GAAATTAATACGACTCACTATAGGGCCATGGAAGGGCCTGGC</b>       |
| RNAprobe_ <i>4431</i> _fw  | Northern analysis; RNA-probe for <i>atu4431</i>                                                                                       | CCTGAAGACCGGTTATGCCGG                                   |
| RNAprobe_ <i>4431</i> _rv  | Northern analysis; RNA-probe for <i>atu4431</i>                                                                                       | <b>GAAATTAATACGACTCACTATAGGGGTTCTCGTTCTTCTGGTTGAGGC</b> |
| RNAprobe_ <i>2422</i> _fw  | Northern analysis; RNA-probe for <i>atu2422</i>                                                                                       | CGGCGTGAAATTCGTTGTC                                     |
| RNAprobe_ <i>2422</i> _rv  | Northern analysis; RNA-probe for <i>atu2422</i>                                                                                       | <b>GAAATTAATACGACTCACTATAGGGTACGCCGGCAGCATTG</b>        |
| DNAProbe_C2A_fw            | Northern analysis; DNA-probe for AbcR1                                                                                                | AAAACCTCCAGAGGGGAACAGC                                  |
| DNAProbe_C2A_rv            | Northern analysis; DNA-probe for AbcR1                                                                                                | CCCATATTTTAGTTAGCTGTCAC                                 |
| runoff_C2A_fw              | plasmid generation for AbcR1 runoff transcription                                                                                     | <b>GAAATTAATACGACTCACTATAGGGAGTTGATGCACACGGTGGC</b>     |
| runoff_C2A_rv              | plasmid generation for AbcR1 runoff transcription                                                                                     | <u>GATATCAAAAAAGAGGGCCGCGG</u>                          |
| runoff_ <i>atu2422</i> _fw | plasmid generation for <i>atu2422</i> runoff transcription                                                                            | <b>GAAATTAATACGACTCACTATAGGGT</b> CGAACAGGTCCTTGAAT     |
| runoff_ <i>atu2422</i> _rv | plasmid generation for <i>atu2422</i> runoff transcription                                                                            | AAAAGATATCAACGCGACCATGGCGGTC                            |
| CHis_Hfq_fw                | Hfq overexpression plasmid generation                                                                                                 | AAAACATATGGCGGAACGTTCTCAAAC                             |
| CHis_Hfq_rv                | Hfq overexpression plasmid generation                                                                                                 | AAAAGT <u>CGACGGCAGCGCCTTCTTCGCTC</u>                   |
| pBBSyn_ <i>hfq</i> _fw     | <i>hfq</i> complementation plasmid generation                                                                                         | AAAATCTAGAATGGCGGAACGTTCTCAAAC                          |
| pBBSyn_ <i>hfq</i> _rv     | <i>hfq</i> complementation plasmid generation                                                                                         | AAAAGAGCT <u>CTCAGGCAGCGCCTTCTTCG</u>                   |

**Figure S1**

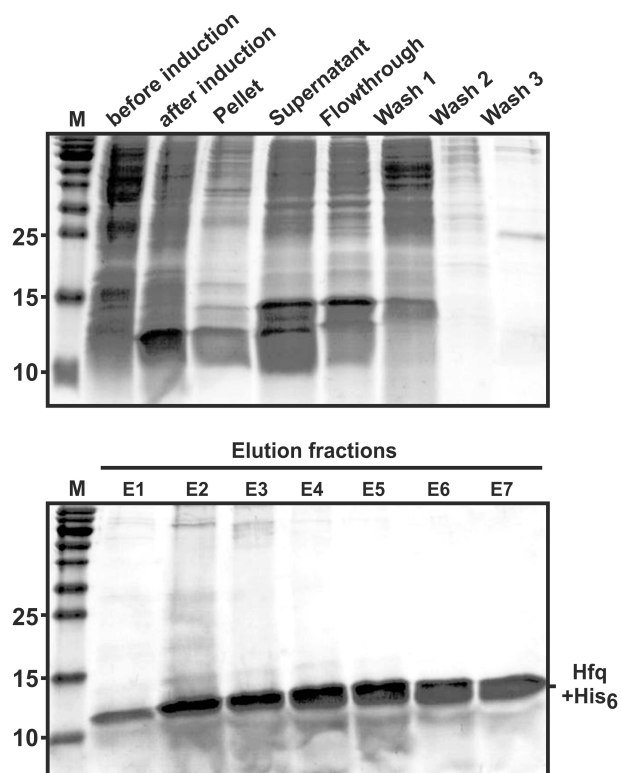

**Purification of the *A. tumefaciens* Hfq protein.** SDS-PAGE (16%) after Ni-NTA purification of C-terminal His<sub>6</sub>-tagged Hfq. The fractions loaded are indicated above. The lower gel shows the elution fractions. The positions of marker proteins (M) are given on the left in kDa.

**Figure S2****A Colony PCR**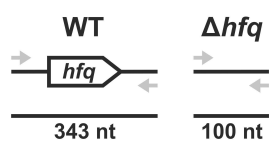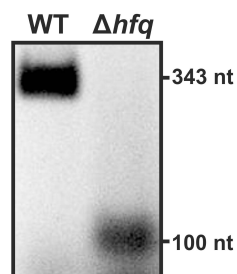**B Northern Blot**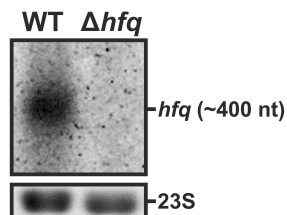**C Transcriptional start site of *hfq* and genetic organization**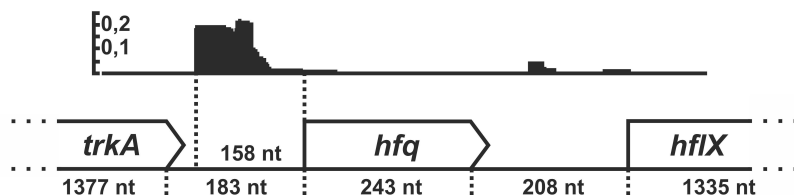

**Verification of the chromosomal *hfq* deletion.** (A) Colony PCR with wild-type (WT) and  $\Delta hfq$  cells. The 2% agarose gel loaded with PCR samples was stained with ethidiumbromide. Diagrams explaining the PCR product lengths are given above. Primers ( $\Delta hfq\_check\_fw/rv$ ) are indicated as grey arrows. (B) Northern blot analysis verifying the absence of *hfq* (~400 nt) in the mutant. Hybridizations were performed with 8  $\mu$ g of total RNA from *A. tumefaciens* wild-type (WT) and the  $\Delta hfq$  mutant. Primers used for RNA-probe generation are listed in table S3. Ethidiumbromide-stained 23S RNAs were used as loading controls. (C) Transcriptional start site of *hfq* revealed by dRNA-seq and genetic organisation with flanking genes *trkA* and *hflX*. The detected band in (B) corresponds to a monocistronic transcript comprised of the 5'-UTR and *hfq* coding region.

Figure S3

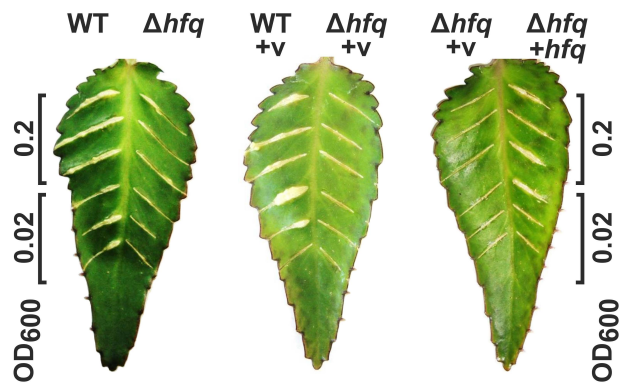

**Altered tumour formation of  $\Delta hfq$  on plants.** Leaves of a *Kalanchoe* plant were inoculated with various *A. tumefaciens* strains. Cultures of the wild-type (WT),  $\Delta hfq$ , the complemented mutant ( $\Delta hfq+hfq$ ) and control strains harboring the vector (v) (WT+v and  $\Delta hfq+v$ ) were diluted to the indicated optical densities and applied on freshly wounded leaves of *Kalanchoe diagamontiana*. Tumour formation was monitored after incubation at room temperature for 4 – 5 weeks and leaves were cut off for evaluation.

(1-6)

1. **Giacomini A, Ollero FJ, Squartini A, Nuti MP.** 1994. Construction of multipurpose gene cartridges based on a novel synthetic promoter for high-level gene expression in Gram-negative bacteria. *Gene* **144**:17-24.
2. **Hanahan D.** 1983. Studies on transformation of *Escherichia coli* with plasmids. *J. Mol. Biol.* **166**:557-80.
3. **Narasimhulu SB, Deng XB, Sarria R, Gelvin SB.** 1996. Early transcription of *Agrobacterium* T-DNA genes in tobacco and maize. *Plant Cell* **8**:873-86.
4. **Norrande J, Kempe T, Messing J.** 1983. Construction of improved M13 vectors using oligodeoxynucleotide-directed mutagenesis. *Gene* **26**:101-6.
5. **Schäfer A, Tauch A, Jäger W, Kalinowski J, Thierbach G, Puhler A.** 1994. Small mobilizable multi-purpose cloning vectors derived from the *Escherichia coli* plasmids pK18 and pK19: selection of defined deletions in the chromosome of *Corynebacterium glutamicum*. *Gene* **145**:69-73.
6. **Wilms I, Voss B, Hess WR, Leichert LI, Narberhaus F.** 2011. Small RNA-mediated control of the *Agrobacterium tumefaciens* GABA binding protein. *Mol. Microbiol.* **80**:492-506.
